# Supplementary material
Source: publisher figshare collection journal article supplement (https://acs.figshare.com/ndownloader/files/5712288)
Supplement: Supplementary file 1 [file 5712288]

# ic981011k.cif

data_LHCAN2 
  
_audit_creation_method            SHELXL 
_chemical_name_systematic 
; 
 ? 
; 
_chemical_name_common             ? 
_chemical_formula_moiety          ? 
_chemical_formula_structural      ? 
_chemical_formula_analytical      ? 
_chemical_formula_sum             'C5 H15 N O12 Co' 
_chemical_formula_weight          340.11 
_chemical_melting_point           ? 
_chemical_compound_source         ? 
  
loop_ 
 _atom_type_symbol 
 _atom_type_description 
 _atom_type_scat_dispersion_real 
 _atom_type_scat_dispersion_imag 
 _atom_type_scat_source 
 'C'  'C'   0.0033   0.0016 
 'International Tables Vol C Tables 4.2.6.8 and 6.1.1.4' 
 'H'  'H'   0.0000   0.0000 
 'International Tables Vol C Tables 4.2.6.8 and 6.1.1.4' 
 'N'  'N'   0.0061   0.0033 
 'International Tables Vol C Tables 4.2.6.8 and 6.1.1.4' 
 'O'  'O'   0.0106   0.0060 
 'International Tables Vol C Tables 4.2.6.8 and 6.1.1.4' 
 'Co'  'Co'   0.3494   0.9721 
 'International Tables Vol C Tables 4.2.6.8 and 6.1.1.4' 
  
_symmetry_cell_setting            Monoclinic 
_symmetry_space_group_name_H-M    P2(1)/m 
  
loop_ 
 _symmetry_equiv_pos_as_xyz 
 'x, y, z' 
 '-x, y+1/2, -z' 
 '-x, -y, -z' 
 'x, -y-1/2, z' 
  
_cell_length_a                    6.409(5) 
_cell_length_b                    14.717(10) 
_cell_length_c                    7.259(6) 
_cell_angle_alpha                 90.00 
_cell_angle_beta                  114.73(4) 
_cell_angle_gamma                 90.00 
_cell_volume                      621.8(8) 
_cell_formula_units_Z             2 
_cell_measurement_temperature     293(2) 
_cell_measurement_reflns_used     28 
_cell_measurement_theta_min       11.68 
_cell_measurement_theta_max       12.60 
  
_exptl_crystal_description        prisms 
_exptl_crystal_colour             Pink 
_exptl_crystal_size_max           0.32 
_exptl_crystal_size_mid           0.31 
_exptl_crystal_size_min           0.20 
_exptl_crystal_density_meas       ? 
_exptl_crystal_density_diffrn     1.816 
_exptl_crystal_density_method     ? 
_exptl_crystal_F_000              350 
_exptl_absorpt_coefficient_mu     1.443 
_exptl_absorpt_correction_type    Empirical 
_exptl_absorpt_correction_T_min   0.2872 
_exptl_absorpt_correction_T_max   0.7321 
  
_exptl_special_details 
; 
 ? 
; 
  
_diffrn_ambient_temperature       293(2) 
_diffrn_radiation_wavelength      0.71073 
_diffrn_radiation_type            MoK\a 
_diffrn_radiation_source          'fine-focus sealed tube' 
_diffrn_radiation_monochromator   graphite 
_diffrn_measurement_device        'Siemens P4' 
_diffrn_measurement_method        '\w scans' 
_diffrn_standards_number          3 
_diffrn_standards_interval_count  97 
_diffrn_standards_interval_time   ? 
_diffrn_standards_decay_%         5.34 
_diffrn_reflns_number             1493 
_diffrn_reflns_av_R_equivalents   0.0663 
_diffrn_reflns_av_sigmaI/netI     0.0463 
_diffrn_reflns_limit_h_min        -7 
_diffrn_reflns_limit_h_max        8 
_diffrn_reflns_limit_k_min        -13 
_diffrn_reflns_limit_k_max        18 
_diffrn_reflns_limit_l_min        -9 
_diffrn_reflns_limit_l_max        8 
_diffrn_reflns_theta_min          2.77 
_diffrn_reflns_theta_max          27.00 
_reflns_number_total              1373 
_reflns_number_observed           1142 
_reflns_observed_criterion        >2sigma(I) 
  
_computing_data_collection        'Siemens XSCANS' 
_computing_cell_refinement        'Siemens XSCANS' 
_computing_data_reduction         'Siemens SHELXTL' 
_computing_structure_solution     'SHELXS-86 (Sheldrick, 1990)' 
_computing_structure_refinement   'SHELXL-93 (Sheldrick, 1993)' 
_computing_molecular_graphics     'Siemens SHELXTL' 
_computing_publication_material   'Siemens SHELXTL' 
  
_refine_special_details 
; 
 Refinement on F^2^ for ALL reflections except for 96 with very negative F^2^ 
 or flagged by the user for potential systematic errors.  Weighted R-factors 
 wR and all goodnesses of fit S are based on F^2^, conventional R-factors R 
 are based on F, with F set to zero for negative F^2^. The observed criterion 
 of F^2^ > 2sigma(F^2^) is used only for calculating _R_factor_obs etc. and is 
 not relevant to the choice of reflections for refinement.  R-factors based 
 on F^2^ are statistically about twice as large as those based on F, and R- 
 factors based on ALL data will be even larger. 
; 
  
_refine_ls_structure_factor_coef  Fsqd 
_refine_ls_matrix_type            full 
_refine_ls_weighting_scheme 
 'calc w=1/[\s^2^(Fo^2^)+(0.0518P)^2^+6.2038P] where P=(Fo^2^+2Fc^2^)/3' 
_atom_sites_solution_primary      direct 
_atom_sites_solution_secondary    difmap 
_atom_sites_solution_hydrogens    geom 
_refine_ls_hydrogen_treatment     ? 
_refine_ls_extinction_method      SHELXL 
_refine_ls_extinction_coef        0.0051(42) 
_refine_ls_extinction_expression 
 'Fc^*^=kFc[1+0.001xFc^2^\l^3^/sin(2\q)]^-1/4^' 
_refine_ls_number_reflns          1277 
_refine_ls_number_parameters      122 
_refine_ls_number_restraints      6 
_refine_ls_R_factor_all           0.0911 
_refine_ls_R_factor_obs           0.0638 
_refine_ls_wR_factor_all          0.2971 
_refine_ls_wR_factor_obs          0.1643 
_refine_ls_goodness_of_fit_all    1.161 
_refine_ls_goodness_of_fit_obs    1.197 
_refine_ls_restrained_S_all       1.986 
_refine_ls_restrained_S_obs       1.193 
_refine_ls_shift/esd_max          0.001 
_refine_ls_shift/esd_mean         0.000 
  
loop_ 
 _atom_site_label 
 _atom_site_type_symbol 
 _atom_site_fract_x 
 _atom_site_fract_y 
 _atom_site_fract_z 
 _atom_site_U_iso_or_equiv 
 _atom_site_thermal_displace_type 
 _atom_site_occupancy 
 _atom_site_calc_flag 
 _atom_site_refinement_flags 
 _atom_site_disorder_group 
Co Co 0.0000 0.0000 -1.0000 0.0099(4) Uani 1 d S . 
C1 C -0.1957(8) -0.1792(4) -1.2222(8) 0.0124(10) Uani 1 d . . 
O1 O -0.1938(6) -0.0949(3) -1.2291(6) 0.0133(8) Uani 1 d . . 
C2 C -0.1098(13) -0.2500 -1.0575(12) 0.0145(15) Uani 1 d S . 
O2 O -0.0170(10) -0.2500 -0.8729(9) 0.0201(13) Uani 1 d S . 
C3 C -0.2803(13) -0.2500 -1.3694(13) 0.014(2) Uani 1 d S . 
C4 C -0.4013(16) -0.2500 -1.5933(14) 0.024(2) Uani 1 d S . 
H4A H -0.4301(16) -0.3117 -1.6415(14) 0.036 Uiso 0.50 d PR . 
H4B H -0.3129(16) -0.2199 -1.6522(14) 0.036 Uiso 0.50 d PR . 
H4C H -0.5416(16) -0.2184 -1.6313(14) 0.036 Uiso 0.50 d PR . 
O5 O 0.2976(7) -0.0687(3) -0.9625(7) 0.0218(10) Uani 1 d D . 
H5A H 0.3910(133) -0.0498(68) -0.8369(61) 0.051(28) Uiso 1 d D . 
H5B H 0.3060(252) -0.0901(111) -1.0754(135) 0.128(60) Uiso 1 d D . 
O6 O -0.0127(7) -0.0723(3) -0.7657(6) 0.0178(9) Uani 1 d D . 
H6A H 0.0054(162) -0.1286(26) -0.7126(136) 0.048(27) Uiso 1 d D . 
H6B H -0.0972(91) -0.0463(42) -0.7075(90) 0.013(16) Uiso 1 d D . 
N N 0.7337(12) 0.2500 -0.7143(11) 0.0173(14) Uani 1 d S . 
O7 O 0.6552(13) 0.2500 -0.9042(10) 0.033(2) Uani 1 d S . 
O8 O 0.7749(9) 0.1775(3) -0.6193(8) 0.0332(12) Uani 1 d . . 
O10 O 0.6796(7) -0.0158(3) -0.6222(6) 0.0188(9) Uani 1 d D . 
H10A H 0.7009(241) 0.0438(22) -0.5931(221) 0.104(51) Uiso 1 d D . 
H10B H 0.7176(112) -0.0297(48) -0.4913(32) 0.014(16) Uiso 1 d D . 
  
loop_ 
 _atom_site_aniso_label 
 _atom_site_aniso_U_11 
 _atom_site_aniso_U_22 
 _atom_site_aniso_U_33 
 _atom_site_aniso_U_23 
 _atom_site_aniso_U_13 
 _atom_site_aniso_U_12 
Co 0.0099(5) 0.0103(5) 0.0093(5) -0.0001(4) 0.0038(4) 0.0001(4) 
C1 0.006(2) 0.014(2) 0.017(2) 0.002(2) 0.005(2) 0.001(2) 
O1 0.015(2) 0.009(2) 0.013(2) -0.0019(14) 0.0038(14) -0.0021(14) 
C2 0.014(4) 0.013(4) 0.017(4) 0.000 0.008(3) 0.000 
O2 0.022(3) 0.016(3) 0.019(3) 0.000 0.006(2) 0.000 
C3 0.011(3) 0.012(3) 0.024(4) 0.000 0.010(3) 0.000 
C4 0.027(4) 0.020(4) 0.020(4) 0.000 0.006(4) 0.000 
O5 0.012(2) 0.022(2) 0.028(2) -0.004(2) 0.006(2) 0.002(2) 
O6 0.022(2) 0.015(2) 0.020(2) 0.001(2) 0.013(2) 0.000(2) 
N 0.018(3) 0.014(3) 0.027(4) 0.000 0.016(3) 0.000 
O7 0.035(4) 0.044(4) 0.020(3) 0.000 0.010(3) 0.000 
O8 0.038(3) 0.020(2) 0.041(3) 0.008(2) 0.016(2) 0.000(2) 
O10 0.017(2) 0.025(2) 0.013(2) -0.002(2) 0.0044(15) -0.001(2) 
  
_geom_special_details 
; 
 All esds (except the esd in the dihedral angle between two l.s. planes) 
 are estimated using the full covariance matrix.  The cell esds are taken 
 into account individually in the estimation of esds in distances, angles 
 and torsion angles; correlations between esds in cell parameters are only 
 used when they are defined by crystal symmetry.  An approximate (isotropic) 
 treatment of cell esds is used for estimating esds involving l.s. planes. 
; 
  
loop_ 
 _geom_bond_atom_site_label_1 
 _geom_bond_atom_site_label_2 
 _geom_bond_distance 
 _geom_bond_site_symmetry_2 
 _geom_bond_publ_flag 
Co O6 2.037(4) . ? 
Co O6 2.037(4) 3_553 ? 
Co O5 2.074(4) 3_553 ? 
Co O5 2.074(4) . ? 
Co O1 2.128(4) 3_553 ? 
Co O1 2.128(4) . ? 
C1 O1 1.242(7) . ? 
C1 C3 1.428(8) . ? 
C1 C2 1.506(8) . ? 
C2 O2 1.218(10) . ? 
C2 C1 1.506(8) 4 ? 
C3 C1 1.428(8) 4 ? 
C3 C4 1.479(12) . ? 
N O8 1.237(6) 4_565 ? 
N O8 1.237(6) . ? 
N O7 1.254(10) . ? 
  
loop_ 
 _geom_angle_atom_site_label_1 
 _geom_angle_atom_site_label_2 
 _geom_angle_atom_site_label_3 
 _geom_angle 
 _geom_angle_site_symmetry_1 
 _geom_angle_site_symmetry_3 
 _geom_angle_publ_flag 
O6 Co O6 180.000(1) . 3_553 ? 
O6 Co O5 90.5(2) . 3_553 ? 
O6 Co O5 89.5(2) 3_553 3_553 ? 
O6 Co O5 89.5(2) . . ? 
O6 Co O5 90.5(2) 3_553 . ? 
O5 Co O5 180.0 3_553 . ? 
O6 Co O1 84.5(2) . 3_553 ? 
O6 Co O1 95.5(2) 3_553 3_553 ? 
O5 Co O1 89.2(2) 3_553 3_553 ? 
O5 Co O1 90.8(2) . 3_553 ? 
O6 Co O1 95.5(2) . . ? 
O6 Co O1 84.5(2) 3_553 . ? 
O5 Co O1 90.8(2) 3_553 . ? 
O5 Co O1 89.2(2) . . ? 
O1 Co O1 180.0 3_553 . ? 
O1 C1 C3 134.9(5) . . ? 
O1 C1 C2 135.8(5) . . ? 
C3 C1 C2 89.3(5) . . ? 
C1 O1 Co 129.5(4) . . ? 
O2 C2 C1 136.2(3) . 4 ? 
O2 C2 C1 136.2(3) . . ? 
C1 C2 C1 87.6(6) 4 . ? 
C1 C3 C1 93.8(7) 4 . ? 
C1 C3 C4 133.1(3) 4 . ? 
C1 C3 C4 133.1(3) . . ? 
O8 N O8 119.1(8) 4_565 . ? 
O8 N O7 120.4(4) 4_565 . ? 
O8 N O7 120.4(4) . . ? 
  
_refine_diff_density_max    0.886 
_refine_diff_density_min   -0.702 
_refine_diff_density_rms    0.165 
  

data_LH9702 
  
_audit_creation_method            SHELXL 
_chemical_name_systematic 
; 
 ? 
; 
_chemical_name_common             ? 
_chemical_formula_moiety          ? 
_chemical_formula_structural      ? 
_chemical_formula_analytical      ? 
_chemical_formula_sum             'C5 H15 N O12 Ni' 
_chemical_formula_weight          339.89 
_chemical_melting_point           ? 
_chemical_compound_source         ? 
  
loop_ 
 _atom_type_symbol 
 _atom_type_description 
 _atom_type_scat_dispersion_real 
 _atom_type_scat_dispersion_imag 
 _atom_type_scat_source 
 'C'  'C'   0.0033   0.0016 
 'International Tables Vol C Tables 4.2.6.8 and 6.1.1.4' 
 'H'  'H'   0.0000   0.0000 
 'International Tables Vol C Tables 4.2.6.8 and 6.1.1.4' 
 'N'  'N'   0.0061   0.0033 
 'International Tables Vol C Tables 4.2.6.8 and 6.1.1.4' 
 'O'  'O'   0.0106   0.0060 
 'International Tables Vol C Tables 4.2.6.8 and 6.1.1.4' 
 'Ni'  'Ni'   0.3393   1.1124 
 'International Tables Vol C Tables 4.2.6.8 and 6.1.1.4' 
  
_symmetry_cell_setting            Monoclinic 
_symmetry_space_group_name_H-M    P2(1)/m 
  
loop_ 
 _symmetry_equiv_pos_as_xyz 
 'x, y, z' 
 '-x, y+1/2, -z' 
 '-x, -y, -z' 
 'x, -y-1/2, z' 
  
_cell_length_a                    6.5473(7) 
_cell_length_b                    14.671(2) 
_cell_length_c                    7.2687(11) 
_cell_angle_alpha                 90.00 
_cell_angle_beta                  114.929(9) 
_cell_angle_gamma                 90.00 
_cell_volume                      633.15(15) 
_cell_formula_units_Z             2 
_cell_measurement_temperature     293(2) 
_cell_measurement_reflns_used     28 
_cell_measurement_theta_min       6.17 
_cell_measurement_theta_max       12.91 
  
_exptl_crystal_description        rhombs 
_exptl_crystal_colour             Green 
_exptl_crystal_size_max           0.73 
_exptl_crystal_size_mid           0.53 
_exptl_crystal_size_min           0.30 
_exptl_crystal_density_meas       ? 
_exptl_crystal_density_diffrn     1.783 
_exptl_crystal_density_method     ? 
_exptl_crystal_F_000              352 
_exptl_absorpt_coefficient_mu     1.594 
_exptl_absorpt_correction_type    none 
_exptl_absorpt_correction_T_min   ? 
_exptl_absorpt_correction_T_max   ? 
  
_exptl_special_details 
; 
 ? 
; 
  
_diffrn_ambient_temperature       293(2) 
_diffrn_radiation_wavelength      0.71073 
_diffrn_radiation_type            MoK\a 
_diffrn_radiation_source          'fine-focus sealed tube' 
_diffrn_radiation_monochromator   graphite 
_diffrn_measurement_device        'Siemens P4' 
_diffrn_measurement_method        '\w scans' 
_diffrn_standards_number          3 
_diffrn_standards_interval_count  97 
_diffrn_standards_interval_time   ? 
_diffrn_standards_decay_%         4.16 
_diffrn_reflns_number             2061 
_diffrn_reflns_av_R_equivalents   0.0135 
_diffrn_reflns_av_sigmaI/netI     0.0210 
_diffrn_reflns_limit_h_min        0 
_diffrn_reflns_limit_h_max        9 
_diffrn_reflns_limit_k_min        0 
_diffrn_reflns_limit_k_max        20 
_diffrn_reflns_limit_l_min        -10 
_diffrn_reflns_limit_l_max        9 
_diffrn_reflns_theta_min          2.78 
_diffrn_reflns_theta_max          29.99 
_reflns_number_total              1916 
_reflns_number_observed           1767 
_reflns_observed_criterion        >2sigma(I) 
  
_computing_data_collection        'Siemens XSCANS' 
_computing_cell_refinement        'Siemens XSCANS' 
_computing_data_reduction         'Siemens SHELXTL' 
_computing_structure_solution     'SHELXS-86 (Sheldrick, 1990)' 
_computing_structure_refinement   'SHELXL-93 (Sheldrick, 1993)' 
_computing_molecular_graphics     'Siemens SHELXTL' 
_computing_publication_material   'Siemens SHELXTL' 
  
_refine_special_details 
; 
 Refinement on F^2^ for ALL reflections except for 0 with very negative F^2^ 
 or flagged by the user for potential systematic errors.  Weighted R-factors 
 wR and all goodnesses of fit S are based on F^2^, conventional R-factors R 
 are based on F, with F set to zero for negative F^2^. The observed criterion 
 of F^2^ > 2sigma(F^2^) is used only for calculating _R_factor_obs etc. and is 
 not relevant to the choice of reflections for refinement.  R-factors based 
 on F^2^ are statistically about twice as large as those based on F, and R- 
 factors based on ALL data will be even larger. 
; 
  
_refine_ls_structure_factor_coef  Fsqd 
_refine_ls_matrix_type            full 
_refine_ls_weighting_scheme 
 'calc w=1/[\s^2^(Fo^2^)+(0.0392P)^2^+0.2287P] where P=(Fo^2^+2Fc^2^)/3' 
_atom_sites_solution_primary      direct 
_atom_sites_solution_secondary    difmap 
_atom_sites_solution_hydrogens    geom 
_refine_ls_hydrogen_treatment     ? 
_refine_ls_extinction_method      SHELXL 
_refine_ls_extinction_coef        0.0245(27) 
_refine_ls_extinction_expression 
 'Fc^*^=kFc[1+0.001xFc^2^\l^3^/sin(2\q)]^-1/4^' 
_refine_ls_number_reflns          1916 
_refine_ls_number_parameters      131 
_refine_ls_number_restraints      6 
_refine_ls_R_factor_all           0.0288 
_refine_ls_R_factor_obs           0.0262 
_refine_ls_wR_factor_all          0.0749 
_refine_ls_wR_factor_obs          0.0726 
_refine_ls_goodness_of_fit_all    1.064 
_refine_ls_goodness_of_fit_obs    1.077 
_refine_ls_restrained_S_all       1.062 
_refine_ls_restrained_S_obs       1.075 
_refine_ls_shift/esd_max          0.966 
_refine_ls_shift/esd_mean         0.049 
  
loop_ 
 _atom_site_label 
 _atom_site_type_symbol 
 _atom_site_fract_x 
 _atom_site_fract_y 
 _atom_site_fract_z 
 _atom_site_U_iso_or_equiv 
 _atom_site_thermal_displace_type 
 _atom_site_occupancy 
 _atom_site_calc_flag 
 _atom_site_refinement_flags 
 _atom_site_disorder_group 
Ni Ni 0.0000 0.0000 -1.0000 0.01979(10) Uani 1 d S . 
C1 C -0.1878(2) -0.17951(8) -1.2146(2) 0.0213(2) Uani 1 d . . 
O1 O -0.1849(2) -0.09446(6) -1.22199(14) 0.0259(2) Uani 1 d . . 
C2 C -0.1024(3) -0.2500 -1.0479(3) 0.0236(4) Uani 1 d S . 
O2 O -0.0105(3) -0.2500 -0.8637(2) 0.0362(4) Uani 1 d S . 
C3 C -0.2711(3) -0.2500 -1.3619(3) 0.0230(3) Uani 1 d S . 
C4 C -0.3962(5) -0.2500 -1.5854(3) 0.0393(6) Uani 1 d S . 
H4A H -0.4249(5) -0.3117 -1.6336(3) 0.059 Uiso 0.50 d PR . 
H4B H -0.3078(5) -0.2199 -1.6443(3) 0.059 Uiso 0.50 d PR . 
H4C H -0.5365(5) -0.2184 -1.6234(3) 0.059 Uiso 0.50 d PR . 
O5 O 0.2926(2) -0.06533(8) -0.9549(2) 0.0375(3) Uani 1 d D . 
H5A H 0.4171(22) -0.0510(15) -0.8432(20) 0.045 Uiso 1 d D . 
H5B H 0.3114(36) -0.1175(8) -1.0109(30) 0.045 Uiso 1 d D . 
O6 O -0.0112(2) -0.07058(7) -0.7636(2) 0.0304(2) Uani 1 d D . 
H6A H 0.0051(34) -0.1312(2) -0.7704(30) 0.036 Uiso 1 d D . 
H6B H -0.1283(22) -0.0572(14) -0.7342(31) 0.036 Uiso 1 d D . 
N N 0.7218(4) 0.2493(9) -0.7305(4) 0.0354(6) Uani 1 d S -1 
O7 O 0.6444(6) 0.2378(7) -0.9163(4) 0.073(2) Uani 0.50 d P -1 
O8 O 0.7714(22) 0.1808(8) -0.6130(9) 0.053(2) Uani 0.50 d P -1 
O9 O 0.7526(24) 0.3248(7) -0.6700(12) 0.076(2) Uani 0.50 d P -1 
O10 O 0.6769(2) -0.01430(9) -0.6235(2) 0.0355(3) Uani 1 d D . 
H10A H 0.6892(37) 0.0468(2) -0.6222(35) 0.043 Uiso 1 d D . 
H10B H 0.7113(37) -0.0315(16) -0.4951(13) 0.043 Uiso 1 d D . 
  
loop_ 
 _atom_site_aniso_label 
 _atom_site_aniso_U_11 
 _atom_site_aniso_U_22 
 _atom_site_aniso_U_33 
 _atom_site_aniso_U_23 
 _atom_site_aniso_U_13 
 _atom_site_aniso_U_12 
Ni 0.02582(15) 0.01318(14) 0.01781(14) -0.00055(7) 0.00668(10) 0.00000(7) 
C1 0.0253(6) 0.0166(6) 0.0191(5) 0.0009(4) 0.0066(4) 0.0001(4) 
O1 0.0370(5) 0.0133(4) 0.0212(4) -0.0001(3) 0.0061(4) -0.0013(4) 
C2 0.0311(9) 0.0140(7) 0.0227(8) 0.000 0.0084(7) 0.000 
O2 0.0599(11) 0.0180(6) 0.0205(7) 0.000 0.0071(7) 0.000 
C3 0.0287(8) 0.0158(7) 0.0208(8) 0.000 0.0069(7) 0.000 
C4 0.0592(15) 0.0257(10) 0.0200(9) 0.000 0.0038(9) 0.000 
O5 0.0300(5) 0.0354(6) 0.0379(6) -0.0101(5) 0.0054(4) 0.0073(5) 
O6 0.0476(6) 0.0185(4) 0.0282(5) 0.0020(4) 0.0191(5) -0.0002(4) 
N 0.0432(11) 0.0267(11) 0.0432(13) -0.016(4) 0.0248(11) -0.004(5) 
O7 0.092(2) 0.087(5) 0.0346(11) 0.009(2) 0.0215(13) 0.050(4) 
O8 0.078(3) 0.038(2) 0.034(2) 0.012(2) 0.015(2) -0.002(2) 
O9 0.113(7) 0.031(3) 0.107(7) -0.026(5) 0.067(6) -0.016(3) 
O10 0.0403(6) 0.0352(6) 0.0259(6) -0.0022(5) 0.0089(5) -0.0009(5) 
  
_geom_special_details 
; 
 All esds (except the esd in the dihedral angle between two l.s. planes) 
 are estimated using the full covariance matrix.  The cell esds are taken 
 into account individually in the estimation of esds in distances, angles 
 and torsion angles; correlations between esds in cell parameters are only 
 used when they are defined by crystal symmetry.  An approximate (isotropic) 
 treatment of cell esds is used for estimating esds involving l.s. planes. 
; 
  
loop_ 
 _geom_bond_atom_site_label_1 
 _geom_bond_atom_site_label_2 
 _geom_bond_distance 
 _geom_bond_site_symmetry_2 
 _geom_bond_publ_flag 
Ni O6 2.0340(11) 3_553 ? 
Ni O6 2.0340(11) . ? 
Ni O5 2.0410(11) . ? 
Ni O5 2.0410(11) 3_553 ? 
Ni O1 2.0839(9) . ? 
Ni O1 2.0839(9) 3_553 ? 
C1 O1 1.249(2) . ? 
C1 C3 1.421(2) . ? 
C1 C2 1.510(2) . ? 
C2 O2 1.215(2) . ? 
C2 C1 1.510(2) 4 ? 
C3 C1 1.421(2) 4 ? 
C3 C4 1.480(3) . ? 
N O8 1.269(15) . ? 
N O9 1.18(2) . ? 
N O7 1.238(4) . ? 
  
loop_ 
 _geom_angle_atom_site_label_1 
 _geom_angle_atom_site_label_2 
 _geom_angle_atom_site_label_3 
 _geom_angle 
 _geom_angle_site_symmetry_1 
 _geom_angle_site_symmetry_3 
 _geom_angle_publ_flag 
O6 Ni O6 180.0 3_553 . ? 
O6 Ni O5 90.53(5) 3_553 . ? 
O6 Ni O5 89.47(5) . . ? 
O6 Ni O5 89.47(5) 3_553 3_553 ? 
O6 Ni O5 90.53(5) . 3_553 ? 
O5 Ni O5 180.0 . 3_553 ? 
O6 Ni O1 84.28(4) 3_553 . ? 
O6 Ni O1 95.72(4) . . ? 
O5 Ni O1 90.67(4) . . ? 
O5 Ni O1 89.33(4) 3_553 . ? 
O6 Ni O1 95.72(4) 3_553 3_553 ? 
O6 Ni O1 84.28(4) . 3_553 ? 
O5 Ni O1 89.33(4) . 3_553 ? 
O5 Ni O1 90.67(4) 3_553 3_553 ? 
O1 Ni O1 180.0 . 3_553 ? 
O1 C1 C3 134.60(12) . . ? 
O1 C1 C2 135.34(12) . . ? 
C3 C1 C2 90.05(10) . . ? 
C1 O1 Ni 130.19(9) . . ? 
O2 C2 C1 136.76(7) . 4 ? 
O2 C2 C1 136.76(7) . . ? 
C1 C2 C1 86.47(14) 4 . ? 
C1 C3 C1 93.36(15) . 4 ? 
C1 C3 C4 133.32(7) . . ? 
C1 C3 C4 133.32(7) 4 . ? 
O8 N O9 122.6(4) . . ? 
O8 N O7 119.8(11) . . ? 
O9 N O7 117.6(11) . . ? 
  
_refine_diff_density_max    0.429 
_refine_diff_density_min   -0.266 
_refine_diff_density_rms    0.063 
  

data_LH9602 
  
_audit_creation_method            SHELXL 
_chemical_name_systematic 
; 
 ? 
; 
_chemical_name_common             ? 
_chemical_formula_moiety          ? 
_chemical_formula_structural      ? 
_chemical_formula_analytical      ? 
_chemical_formula_sum             'C10 H14 O10 Mn' 
_chemical_formula_weight          349.15 
_chemical_melting_point           ? 
_chemical_compound_source         ? 
  
loop_ 
 _atom_type_symbol 
 _atom_type_description 
 _atom_type_scat_dispersion_real 
 _atom_type_scat_dispersion_imag 
 _atom_type_scat_source 
 'C'  'C'   0.0033   0.0016 
 'International Tables Vol C Tables 4.2.6.8 and 6.1.1.4' 
 'H'  'H'   0.0000   0.0000 
 'International Tables Vol C Tables 4.2.6.8 and 6.1.1.4' 
 'O'  'O'   0.0106   0.0060 
 'International Tables Vol C Tables 4.2.6.8 and 6.1.1.4' 
 'Mn'  'Mn'   0.3368   0.7283 
 'International Tables Vol C Tables 4.2.6.8 and 6.1.1.4' 
  
_symmetry_cell_setting            Monoclinic 
_symmetry_space_group_name_H-M    P2(1)/n 
  
loop_ 
 _symmetry_equiv_pos_as_xyz 
 'x, y, z' 
 '-x+1/2, y+1/2, -z+1/2' 
 '-x, -y, -z' 
 'x-1/2, -y-1/2, z-1/2' 
  
_cell_length_a                    8.8258(8) 
_cell_length_b                    16.1527(14) 
_cell_length_c                    9.9084(8) 
_cell_angle_alpha                 90.00 
_cell_angle_beta                  93.230(7) 
_cell_angle_gamma                 90.00 
_cell_volume                      1410.3(2) 
_cell_formula_units_Z             4 
_cell_measurement_temperature     293(2) 
_cell_measurement_reflns_used     23 
_cell_measurement_theta_min       5.25 
_cell_measurement_theta_max       15.01 
  
_exptl_crystal_description        Prisms 
_exptl_crystal_colour             Yellow 
_exptl_crystal_size_max           0.73 
_exptl_crystal_size_mid           0.33 
_exptl_crystal_size_min           0.33 
_exptl_crystal_density_meas       ? 
_exptl_crystal_density_diffrn     1.644 
_exptl_crystal_density_method     ? 
_exptl_crystal_F_000              716 
_exptl_absorpt_coefficient_mu     0.984 
_exptl_absorpt_correction_type    Semi-empirical 
_exptl_absorpt_correction_T_min   0.4905 
_exptl_absorpt_correction_T_max   0.5757 
  
_exptl_special_details 
; 
 ? 
; 
  
_diffrn_ambient_temperature       293(2) 
_diffrn_radiation_wavelength      0.71073 
_diffrn_radiation_type            MoK\a 
_diffrn_radiation_source          'fine-focus sealed tube' 
_diffrn_radiation_monochromator   graphite 
_diffrn_measurement_device        'Siemens P4' 
_diffrn_measurement_method        '\w scans' 
_diffrn_standards_number          3 
_diffrn_standards_interval_count  97 
_diffrn_standards_interval_time   ? 
_diffrn_standards_decay_%         6.38 
_diffrn_reflns_number             4344 
_diffrn_reflns_av_R_equivalents   0.0253 
_diffrn_reflns_av_sigmaI/netI     0.0416 
_diffrn_reflns_limit_h_min        0 
_diffrn_reflns_limit_h_max        12 
_diffrn_reflns_limit_k_min        0 
_diffrn_reflns_limit_k_max        22 
_diffrn_reflns_limit_l_min        -13 
_diffrn_reflns_limit_l_max        13 
_diffrn_reflns_theta_min          2.41 
_diffrn_reflns_theta_max          30.00 
_reflns_number_total              4109 
_reflns_number_observed           3303 
_reflns_observed_criterion        >2sigma(I) 
  
_computing_data_collection        'Siemens XSCANS' 
_computing_cell_refinement        'Siemens XSCANS' 
_computing_data_reduction         'Siemens SHELXTL' 
_computing_structure_solution     'SHELXS-86 (Sheldrick, 1990)' 
_computing_structure_refinement   'SHELXL-93 (Sheldrick, 1993)' 
_computing_molecular_graphics     'Siemens SHELXTL' 
_computing_publication_material   'Siemens SHELXTL' 
  
_refine_special_details 
; 
 Refinement on F^2^ for ALL reflections except for 0 with very negative F^2^ 
 or flagged by the user for potential systematic errors.  Weighted R-factors 
 wR and all goodnesses of fit S are based on F^2^, conventional R-factors R 
 are based on F, with F set to zero for negative F^2^. The observed criterion 
 of F^2^ > 2sigma(F^2^) is used only for calculating _R_factor_obs etc. and is 
 not relevant to the choice of reflections for refinement.  R-factors based 
 on F^2^ are statistically about twice as large as those based on F, and R- 
 factors based on ALL data will be even larger. 
; 
  
_refine_ls_structure_factor_coef  Fsqd 
_refine_ls_matrix_type            full 
_refine_ls_weighting_scheme 
 'calc w=1/[\s^2^(Fo^2^)+(0.0473P)^2^+0.3065P] where P=(Fo^2^+2Fc^2^)/3' 
_atom_sites_solution_primary      direct 
_atom_sites_solution_secondary    difmap 
_atom_sites_solution_hydrogens    geom 
_refine_ls_hydrogen_treatment     ? 
_refine_ls_extinction_method      SHELXL 
_refine_ls_extinction_coef        0.0238(14) 
_refine_ls_extinction_expression 
 'Fc^*^=kFc[1+0.001xFc^2^\l^3^/sin(2\q)]^-1/4^' 
_refine_ls_number_reflns          4109 
_refine_ls_number_parameters      223 
_refine_ls_number_restraints      8 
_refine_ls_R_factor_all           0.0506 
_refine_ls_R_factor_obs           0.0376 
_refine_ls_wR_factor_all          0.1058 
_refine_ls_wR_factor_obs          0.0973 
_refine_ls_goodness_of_fit_all    1.048 
_refine_ls_goodness_of_fit_obs    1.081 
_refine_ls_restrained_S_all       1.048 
_refine_ls_restrained_S_obs       1.080 
_refine_ls_shift/esd_max          0.000 
_refine_ls_shift/esd_mean         0.000 
  
loop_ 
 _atom_site_label 
 _atom_site_type_symbol 
 _atom_site_fract_x 
 _atom_site_fract_y 
 _atom_site_fract_z 
 _atom_site_U_iso_or_equiv 
 _atom_site_thermal_displace_type 
 _atom_site_occupancy 
 _atom_site_calc_flag 
 _atom_site_refinement_flags 
 _atom_site_disorder_group 
Mn Mn 0.04016(3) 0.12433(2) 0.20956(3) 0.02480(10) Uani 1 d . . 
O1 O 0.2299(2) 0.09012(8) 0.09554(14) 0.0327(3) Uani 1 d D . 
H1A H 0.2307(36) 0.1167(15) 0.0175(16) 0.059(9) Uiso 1 d D . 
H1B H 0.2583(31) 0.0369(8) 0.0911(30) 0.059(8) Uiso 1 d D . 
O2 O 0.1635(2) 0.08257(9) 0.39083(14) 0.0349(3) Uani 1 d D . 
H2A H 0.2386(24) 0.1069(17) 0.4409(26) 0.061(9) Uiso 1 d D . 
H2B H 0.1670(31) 0.0285(7) 0.4107(27) 0.052(8) Uiso 1 d D . 
O3 O -0.1488(2) 0.16288(9) 0.32763(14) 0.0344(3) Uani 1 d D . 
H3A H -0.1902(27) 0.2132(9) 0.3280(27) 0.045(7) Uiso 1 d D . 
H3B H -0.1427(36) 0.1385(17) 0.4088(16) 0.060(9) Uiso 1 d D . 
O4 O -0.0815(2) 0.16727(8) 0.02880(15) 0.0341(3) Uani 1 d D . 
H4A H -0.1542(26) 0.1377(16) -0.0157(28) 0.063(9) Uiso 1 d D . 
H4B H -0.0982(31) 0.2216(7) 0.0194(27) 0.052(8) Uiso 1 d D . 
O5 O -0.0660(2) 0.00000(8) 0.18513(14) 0.0326(3) Uani 1 d . . 
C5 C -0.0537(2) -0.06807(10) 0.2371(2) 0.0247(3) Uani 1 d . . 
C6 C -0.1331(2) -0.15061(10) 0.2191(2) 0.0253(3) Uani 1 d . . 
O6 O -0.2388(2) -0.17668(8) 0.14331(14) 0.0325(3) Uani 1 d . . 
C7 C -0.0372(2) -0.18398(11) 0.3261(2) 0.0280(3) Uani 1 d . . 
C8 C 0.0419(2) -0.10805(11) 0.3498(2) 0.0256(3) Uani 1 d . . 
O8 O 0.1458(2) -0.08269(9) 0.42927(14) 0.0345(3) Uani 1 d . . 
C9 C -0.0255(3) -0.26669(13) 0.3884(3) 0.0473(6) Uani 1 d . . 
H9A H -0.1141(3) -0.29871(13) 0.3627(3) 0.071 Uiso 1 d R . 
H9B H -0.0160(3) -0.26127(13) 0.4850(3) 0.071 Uiso 1 d R . 
H9C H 0.0634(3) -0.29432(13) 0.3595(3) 0.071 Uiso 1 d R . 
O10 O 0.1415(2) 0.24880(8) 0.24855(15) 0.0350(3) Uani 1 d . . 
C10 C 0.0920(2) 0.31838(10) 0.2294(2) 0.0261(3) Uani 1 d . . 
C11 C 0.1192(2) 0.40121(11) 0.2941(2) 0.0279(4) Uani 1 d . . 
O11 O 0.2067(2) 0.42617(9) 0.3876(2) 0.0413(4) Uani 1 d . . 
C12 C 0.0044(2) 0.43627(11) 0.2051(2) 0.0290(4) Uani 1 d . . 
C13 C -0.0260(2) 0.35983(11) 0.1366(2) 0.0286(4) Uani 1 d . . 
O13 O -0.1127(2) 0.33499(9) 0.0428(2) 0.0437(4) Uani 1 d . . 
C14 C -0.0614(3) 0.52004(13) 0.1915(3) 0.0460(6) Uani 1 d . . 
H14A H -0.1332(3) 0.52155(13) 0.1151(3) 0.069 Uiso 1 d R . 
H14B H 0.0177(3) 0.55976(13) 0.1795(3) 0.069 Uiso 1 d R . 
H14C H -0.1111(3) 0.53426(13) 0.2721(3) 0.069 Uiso 1 d R . 
  
loop_ 
 _atom_site_aniso_label 
 _atom_site_aniso_U_11 
 _atom_site_aniso_U_22 
 _atom_site_aniso_U_33 
 _atom_site_aniso_U_23 
 _atom_site_aniso_U_13 
 _atom_site_aniso_U_12 
Mn 0.0297(2) 0.01738(14) 0.02642(15) 0.00024(9) -0.00612(10) -0.00042(9) 
O1 0.0411(8) 0.0255(6) 0.0316(7) 0.0034(5) 0.0016(6) 0.0050(5) 
O2 0.0427(8) 0.0257(6) 0.0344(7) 0.0031(5) -0.0167(6) -0.0043(6) 
O3 0.0413(8) 0.0299(7) 0.0319(7) 0.0033(5) 0.0015(6) 0.0088(6) 
O4 0.0399(8) 0.0281(7) 0.0326(7) 0.0008(5) -0.0136(6) 0.0015(6) 
O5 0.0395(7) 0.0197(6) 0.0373(7) 0.0038(5) -0.0098(6) -0.0051(5) 
C5 0.0270(8) 0.0208(7) 0.0259(8) -0.0009(6) -0.0008(6) -0.0033(6) 
C6 0.0304(8) 0.0200(7) 0.0252(7) 0.0008(6) -0.0008(6) -0.0043(6) 
O6 0.0368(7) 0.0273(6) 0.0322(7) 0.0023(5) -0.0071(5) -0.0100(5) 
C7 0.0314(9) 0.0220(8) 0.0302(8) 0.0025(6) -0.0014(7) -0.0015(6) 
C8 0.0272(8) 0.0228(7) 0.0265(8) 0.0018(6) -0.0007(6) -0.0015(6) 
O8 0.0378(7) 0.0311(7) 0.0330(7) 0.0069(5) -0.0112(6) -0.0081(6) 
C9 0.0585(14) 0.0251(9) 0.0557(13) 0.0115(9) -0.0208(11) -0.0057(9) 
O10 0.0388(7) 0.0175(6) 0.0467(8) -0.0001(5) -0.0149(6) 0.0000(5) 
C10 0.0263(8) 0.0203(7) 0.0308(8) 0.0010(6) -0.0052(6) -0.0017(6) 
C11 0.0305(8) 0.0195(7) 0.0330(9) 0.0009(6) -0.0051(7) -0.0028(6) 
O11 0.0498(8) 0.0240(6) 0.0475(8) -0.0020(6) -0.0215(7) -0.0035(6) 
C12 0.0281(8) 0.0214(8) 0.0366(9) 0.0011(7) -0.0047(7) 0.0003(6) 
C13 0.0282(8) 0.0210(7) 0.0356(9) 0.0024(6) -0.0078(7) 0.0006(6) 
O13 0.0497(9) 0.0306(7) 0.0475(9) -0.0018(6) -0.0263(7) 0.0034(6) 
C14 0.0427(12) 0.0248(9) 0.069(2) -0.0013(9) -0.0118(11) 0.0073(8) 
  
_geom_special_details 
; 
 All esds (except the esd in the dihedral angle between two l.s. planes) 
 are estimated using the full covariance matrix.  The cell esds are taken 
 into account individually in the estimation of esds in distances, angles 
 and torsion angles; correlations between esds in cell parameters are only 
 used when they are defined by crystal symmetry.  An approximate (isotropic) 
 treatment of cell esds is used for estimating esds involving l.s. planes. 
; 
  
loop_ 
 _geom_bond_atom_site_label_1 
 _geom_bond_atom_site_label_2 
 _geom_bond_distance 
 _geom_bond_site_symmetry_2 
 _geom_bond_publ_flag 
Mn O1 2.1447(15) . ? 
Mn O4 2.1508(13) . ? 
Mn O2 2.1554(13) . ? 
Mn O3 2.1809(15) . ? 
Mn O5 2.2234(13) . ? 
Mn O10 2.2253(13) . ? 
O5 C5 1.216(2) . ? 
C5 C8 1.506(2) . ? 
C5 C6 1.512(2) . ? 
C6 O6 1.238(2) . ? 
C6 C7 1.425(2) . ? 
C7 C8 1.424(2) . ? 
C7 C9 1.473(3) . ? 
C8 O8 1.244(2) . ? 
O10 C10 1.217(2) . ? 
C10 C11 1.497(2) . ? 
C10 C13 1.507(2) . ? 
C11 O11 1.240(2) . ? 
C11 C12 1.423(2) . ? 
C12 C13 1.427(2) . ? 
C12 C14 1.476(3) . ? 
C13 O13 1.237(2) . ? 
  
loop_ 
 _geom_angle_atom_site_label_1 
 _geom_angle_atom_site_label_2 
 _geom_angle_atom_site_label_3 
 _geom_angle 
 _geom_angle_site_symmetry_1 
 _geom_angle_site_symmetry_3 
 _geom_angle_publ_flag 
O1 Mn O4 90.72(6) . . ? 
O1 Mn O2 89.17(6) . . ? 
O4 Mn O2 179.36(6) . . ? 
O1 Mn O3 178.08(6) . . ? 
O4 Mn O3 89.63(6) . . ? 
O2 Mn O3 90.46(6) . . ? 
O1 Mn O5 92.67(5) . . ? 
O4 Mn O5 90.75(5) . . ? 
O2 Mn O5 89.89(5) . . ? 
O3 Mn O5 89.21(6) . . ? 
O1 Mn O10 90.35(6) . . ? 
O4 Mn O10 91.72(5) . . ? 
O2 Mn O10 87.65(5) . . ? 
O3 Mn O10 87.75(6) . . ? 
O5 Mn O10 176.07(5) . . ? 
C5 O5 Mn 138.01(12) . . ? 
O5 C5 C8 137.2(2) . . ? 
O5 C5 C6 135.8(2) . . ? 
C8 C5 C6 86.90(12) . . ? 
O6 C6 C7 135.9(2) . . ? 
O6 C6 C5 134.4(2) . . ? 
C7 C6 C5 89.65(13) . . ? 
C8 C7 C6 93.53(14) . . ? 
C8 C7 C9 133.6(2) . . ? 
C6 C7 C9 132.8(2) . . ? 
O8 C8 C7 136.4(2) . . ? 
O8 C8 C5 133.6(2) . . ? 
C7 C8 C5 89.91(13) . . ? 
C10 O10 Mn 132.10(12) . . ? 
O10 C10 C11 135.4(2) . . ? 
O10 C10 C13 137.3(2) . . ? 
C11 C10 C13 87.28(13) . . ? 
O11 C11 C12 136.5(2) . . ? 
O11 C11 C10 133.5(2) . . ? 
C12 C11 C10 89.94(14) . . ? 
C11 C12 C13 93.35(14) . . ? 
C11 C12 C14 133.2(2) . . ? 
C13 C12 C14 133.5(2) . . ? 
O13 C13 C12 136.9(2) . . ? 
O13 C13 C10 133.7(2) . . ? 
C12 C13 C10 89.40(14) . . ? 
  
_refine_diff_density_max    0.390 
_refine_diff_density_min   -0.301 
_refine_diff_density_rms    0.069 
  

data_LHCAN 
  
_audit_creation_method            SHELXL 
_chemical_name_systematic 
; 
 ? 
; 
_chemical_name_common             ? 
_chemical_formula_moiety          ? 
_chemical_formula_structural      ? 
_chemical_formula_analytical      ? 
_chemical_formula_sum             'C10 H14 O10 Co' 
_chemical_formula_weight          353.14 
_chemical_melting_point           ? 
_chemical_compound_source         ? 
  
loop_ 
 _atom_type_symbol 
 _atom_type_description 
 _atom_type_scat_dispersion_real 
 _atom_type_scat_dispersion_imag 
 _atom_type_scat_source 
 'C'  'C'   0.0033   0.0016 
 'International Tables Vol C Tables 4.2.6.8 and 6.1.1.4' 
 'H'  'H'   0.0000   0.0000 
 'International Tables Vol C Tables 4.2.6.8 and 6.1.1.4' 
 'O'  'O'   0.0106   0.0060 
 'International Tables Vol C Tables 4.2.6.8 and 6.1.1.4' 
 'Co'  'Co'   0.3494   0.9721 
 'International Tables Vol C Tables 4.2.6.8 and 6.1.1.4' 
  
_symmetry_cell_setting            Monoclinic 
_symmetry_space_group_name_H-M    P2(1)/n 
  
loop_ 
 _symmetry_equiv_pos_as_xyz 
 'x, y, z' 
 '-x+1/2, y+1/2, -z+1/2' 
 '-x, -y, -z' 
 'x-1/2, -y-1/2, z-1/2' 
  
_cell_length_a                    8.7748(2) 
_cell_length_b                    16.0212(3) 
_cell_length_c                    9.8083(2) 
_cell_angle_alpha                 90.00 
_cell_angle_beta                  93.5950(10) 
_cell_angle_gamma                 90.00 
_cell_volume                      1376.17(5) 
_cell_formula_units_Z             4 
_cell_measurement_temperature     300(2) 
_cell_measurement_reflns_used     ? 
_cell_measurement_theta_min       ? 
_cell_measurement_theta_max       ? 
  
_exptl_crystal_description        blocks 
_exptl_crystal_colour             Pink 
_exptl_crystal_size_max           0.30 
_exptl_crystal_size_mid           0.10 
_exptl_crystal_size_min           0.04 
_exptl_crystal_density_meas       ? 
_exptl_crystal_density_diffrn     1.704 
_exptl_crystal_density_method     ? 
_exptl_crystal_F_000              724 
_exptl_absorpt_coefficient_mu     1.296 
_exptl_absorpt_correction_type    Empirical 
_exptl_absorpt_correction_T_min   0.7163 
_exptl_absorpt_correction_T_max   0.9317 
  
_exptl_special_details 
; 
 ? 
; 
  
_diffrn_ambient_temperature       300(2) 
_diffrn_radiation_wavelength      0.71073 
_diffrn_radiation_type            MoK\a 
_diffrn_radiation_source          'fine-focus sealed tube' 
_diffrn_radiation_monochromator   graphite 
_diffrn_measurement_device        'Siemens P4' 
_diffrn_measurement_method        '\w scans' 
_diffrn_standards_number          ? 
_diffrn_standards_interval_count  ? 
_diffrn_standards_interval_time   ? 
_diffrn_standards_decay_%         ? 
_diffrn_reflns_number             11304 
_diffrn_reflns_av_R_equivalents   0.0463 
_diffrn_reflns_av_sigmaI/netI     0.0403 
_diffrn_reflns_limit_h_min        -10 
_diffrn_reflns_limit_h_max        10 
_diffrn_reflns_limit_k_min        -20 
_diffrn_reflns_limit_k_max        20 
_diffrn_reflns_limit_l_min        -11 
_diffrn_reflns_limit_l_max        11 
_diffrn_reflns_theta_min          2.44 
_diffrn_reflns_theta_max          26.41 
_reflns_number_total              2771 
_reflns_number_observed           2091 
_reflns_observed_criterion        >2sigma(I) 
  
_computing_data_collection        'Siemens XSCANS' 
_computing_cell_refinement        'Siemens XSCANS' 
_computing_data_reduction         'Siemens SHELXTL' 
_computing_structure_solution     'SHELXS-86 (Sheldrick, 1990)' 
_computing_structure_refinement   'SHELXL-93 (Sheldrick, 1993)' 
_computing_molecular_graphics     'Siemens SHELXTL' 
_computing_publication_material   'Siemens SHELXTL' 
  
_refine_special_details 
; 
 Refinement on F^2^ for ALL reflections except for 0 with very negative F^2^ 
 or flagged by the user for potential systematic errors.  Weighted R-factors 
 wR and all goodnesses of fit S are based on F^2^, conventional R-factors R 
 are based on F, with F set to zero for negative F^2^. The observed criterion 
 of F^2^ > 2sigma(F^2^) is used only for calculating _R_factor_obs etc. and is 
 not relevant to the choice of reflections for refinement.  R-factors based 
 on F^2^ are statistically about twice as large as those based on F, and R- 
 factors based on ALL data will be even larger. 
; 
  
_refine_ls_structure_factor_coef  Fsqd 
_refine_ls_matrix_type            full 
_refine_ls_weighting_scheme 
 'calc w=1/[\s^2^(Fo^2^)+(0.0366P)^2^+0.7252P] where P=(Fo^2^+2Fc^2^)/3' 
_atom_sites_solution_primary      direct 
_atom_sites_solution_secondary    difmap 
_atom_sites_solution_hydrogens    geom 
_refine_ls_hydrogen_treatment     ? 
_refine_ls_extinction_method      SHELXL 
_refine_ls_extinction_coef        0.0020(6) 
_refine_ls_extinction_expression 
 'Fc^*^=kFc[1+0.001xFc^2^\l^3^/sin(2\q)]^-1/4^' 
_refine_ls_number_reflns          2771 
_refine_ls_number_parameters      223 
_refine_ls_number_restraints      8 
_refine_ls_R_factor_all           0.0586 
_refine_ls_R_factor_obs           0.0355 
_refine_ls_wR_factor_all          0.0855 
_refine_ls_wR_factor_obs          0.0751 
_refine_ls_goodness_of_fit_all    1.059 
_refine_ls_goodness_of_fit_obs    1.084 
_refine_ls_restrained_S_all       1.057 
_refine_ls_restrained_S_obs       1.082 
_refine_ls_shift/esd_max          0.001 
_refine_ls_shift/esd_mean         0.000 
  
loop_ 
 _atom_site_label 
 _atom_site_type_symbol 
 _atom_site_fract_x 
 _atom_site_fract_y 
 _atom_site_fract_z 
 _atom_site_U_iso_or_equiv 
 _atom_site_thermal_displace_type 
 _atom_site_occupancy 
 _atom_site_calc_flag 
 _atom_site_refinement_flags 
 _atom_site_disorder_group 
Co Co 0.03857(4) 0.12519(2) 0.21228(4) 0.02402(13) Uani 1 d . . 
O1 O 0.2219(2) 0.09172(12) 0.1048(2) 0.0308(5) Uani 1 d D . 
H1A H 0.2329(43) 0.1142(21) 0.0219(16) 0.060(12) Uiso 1 d D . 
H1B H 0.2493(34) 0.0378(6) 0.0983(32) 0.041(9) Uiso 1 d D . 
O2 O 0.1545(2) 0.08539(12) 0.3893(2) 0.0327(5) Uani 1 d D . 
H2A H 0.2316(24) 0.1139(18) 0.4323(30) 0.048(10) Uiso 1 d D . 
H2B H 0.1636(39) 0.0305(5) 0.4073(35) 0.054(11) Uiso 1 d D . 
O3 O -0.1451(2) 0.16107(13) 0.3247(2) 0.0324(5) Uani 1 d D . 
H3A H -0.1797(41) 0.2136(8) 0.3332(38) 0.063(12) Uiso 1 d D . 
H3B H -0.1465(47) 0.1360(22) 0.4067(18) 0.073(13) Uiso 1 d D . 
O4 O -0.0763(2) 0.16586(12) 0.0361(2) 0.0320(5) Uani 1 d D . 
H4A H -0.1512(34) 0.1351(23) -0.0058(40) 0.094(16) Uiso 1 d D . 
H4B H -0.0984(37) 0.2203(5) 0.0240(33) 0.044(9) Uiso 1 d D . 
O5 O -0.0678(2) 0.00350(11) 0.1814(2) 0.0303(5) Uani 1 d . . 
C5 C -0.0550(3) -0.0654(2) 0.2346(3) 0.0244(6) Uani 1 d . . 
C6 C -0.1335(3) -0.1491(2) 0.2152(3) 0.0262(6) Uani 1 d . . 
O6 O -0.2401(2) -0.17616(12) 0.1376(2) 0.0332(5) Uani 1 d . . 
C7 C -0.0368(3) -0.1825(2) 0.3235(3) 0.0279(6) Uani 1 d . . 
C8 C 0.0415(3) -0.1056(2) 0.3483(3) 0.0263(6) Uani 1 d . . 
O8 O 0.1460(2) -0.08024(12) 0.4301(2) 0.0343(5) Uani 1 d . . 
C9 C -0.0254(4) -0.2667(2) 0.3856(4) 0.0465(9) Uani 1 d . . 
H9A H -0.1156(4) -0.2983(2) 0.3601(4) 0.070 Uiso 1 d R . 
H9B H -0.0151(4) -0.2611(2) 0.4834(4) 0.070 Uiso 1 d R . 
H9C H 0.0621(4) -0.2951(2) 0.3545(4) 0.070 Uiso 1 d R . 
O10 O 0.1405(2) 0.24600(11) 0.2533(2) 0.0322(5) Uani 1 d . . 
C10 C 0.0922(3) 0.3165(2) 0.2319(3) 0.0253(6) Uani 1 d . . 
C11 C 0.1224(3) 0.4006(2) 0.2953(3) 0.0279(6) Uani 1 d . . 
O11 O 0.2117(2) 0.42656(12) 0.3884(2) 0.0392(5) Uani 1 d . . 
C12 C 0.0052(3) 0.4357(2) 0.2047(3) 0.0279(6) Uani 1 d . . 
C13 C -0.0275(3) 0.3584(2) 0.1374(3) 0.0279(6) Uani 1 d . . 
O13 O -0.1160(3) 0.33297(12) 0.0424(2) 0.0410(5) Uani 1 d . . 
C14 C -0.0606(4) 0.5206(2) 0.1905(4) 0.0463(9) Uani 1 d . . 
H14A H 0.0201(4) 0.5611(2) 0.1939(4) 0.069 Uiso 1 d R . 
H14B H -0.1259(4) 0.5309(2) 0.2636(4) 0.069 Uiso 1 d R . 
H14C H -0.1186(4) 0.5249(2) 0.1044(4) 0.069 Uiso 1 d R . 
  
loop_ 
 _atom_site_aniso_label 
 _atom_site_aniso_U_11 
 _atom_site_aniso_U_22 
 _atom_site_aniso_U_33 
 _atom_site_aniso_U_23 
 _atom_site_aniso_U_13 
 _atom_site_aniso_U_12 
Co 0.0286(2) 0.0167(2) 0.0257(2) 0.00047(15) -0.00693(14) -0.0001(2) 
O1 0.0397(12) 0.0216(10) 0.0310(12) 0.0024(9) 0.0005(9) 0.0037(9) 
O2 0.0410(13) 0.0227(11) 0.0321(11) 0.0018(9) -0.0165(9) -0.0042(9) 
O3 0.0380(12) 0.0272(11) 0.0320(12) 0.0019(9) 0.0022(9) 0.0051(9) 
O4 0.0397(13) 0.0244(11) 0.0301(11) 0.0013(9) -0.0122(9) 0.0008(9) 
O5 0.0367(12) 0.0201(10) 0.0328(11) 0.0018(8) -0.0080(9) -0.0030(8) 
C5 0.0278(15) 0.0214(14) 0.0239(14) -0.0008(11) 0.0000(11) -0.0002(11) 
C6 0.032(2) 0.0210(13) 0.0260(14) 0.0006(11) 0.0041(12) -0.0009(11) 
O6 0.0364(12) 0.0287(11) 0.0331(11) 0.0022(9) -0.0093(9) -0.0096(9) 
C7 0.030(2) 0.0245(14) 0.029(2) 0.0017(12) -0.0013(12) -0.0015(12) 
C8 0.027(2) 0.0255(15) 0.0266(14) 0.0001(11) -0.0005(11) 0.0002(11) 
O8 0.0377(12) 0.0293(11) 0.0340(12) 0.0063(9) -0.0119(9) -0.0085(9) 
C9 0.057(2) 0.027(2) 0.053(2) 0.0080(15) -0.019(2) -0.0063(15) 
O10 0.0359(11) 0.0172(10) 0.0416(12) 0.0011(9) -0.0119(9) -0.0005(8) 
C10 0.0247(14) 0.0197(13) 0.0305(15) 0.0031(11) -0.0058(11) -0.0012(12) 
C11 0.030(2) 0.0190(13) 0.034(2) 0.0020(12) -0.0041(13) -0.0024(11) 
O11 0.0467(13) 0.0226(11) 0.0453(13) -0.0022(9) -0.0211(10) -0.0034(9) 
C12 0.026(2) 0.0209(13) 0.036(2) 0.0011(12) -0.0025(12) 0.0000(11) 
C13 0.0252(15) 0.0233(14) 0.034(2) 0.0017(12) -0.0050(12) -0.0006(11) 
O13 0.0485(14) 0.0260(11) 0.0452(13) -0.0012(10) -0.0251(10) 0.0012(10) 
C14 0.046(2) 0.023(2) 0.067(2) -0.001(2) -0.018(2) 0.0056(14) 
  
_geom_special_details 
; 
 All esds (except the esd in the dihedral angle between two l.s. planes) 
 are estimated using the full covariance matrix.  The cell esds are taken 
 into account individually in the estimation of esds in distances, angles 
 and torsion angles; correlations between esds in cell parameters are only 
 used when they are defined by crystal symmetry.  An approximate (isotropic) 
 treatment of cell esds is used for estimating esds involving l.s. planes. 
; 
  
loop_ 
 _geom_bond_atom_site_label_1 
 _geom_bond_atom_site_label_2 
 _geom_bond_distance 
 _geom_bond_site_symmetry_2 
 _geom_bond_publ_flag 
Co O1 2.049(2) . ? 
Co O4 2.052(2) . ? 
Co O2 2.057(2) . ? 
Co O3 2.089(2) . ? 
Co O10 2.159(2) . ? 
Co O5 2.175(2) . ? 
O5 C5 1.223(3) . ? 
C5 C8 1.502(4) . ? 
C5 C6 1.514(4) . ? 
C6 O6 1.245(3) . ? 
C6 C7 1.422(4) . ? 
C7 C8 1.423(4) . ? 
C7 C9 1.481(4) . ? 
C8 O8 1.248(3) . ? 
O10 C10 1.220(3) . ? 
C10 C11 1.501(4) . ? 
C10 C13 1.513(4) . ? 
C11 O11 1.237(3) . ? 
C11 C12 1.430(4) . ? 
C12 C13 1.424(4) . ? 
C12 C14 1.482(4) . ? 
C13 O13 1.243(3) . ? 
  
loop_ 
 _geom_angle_atom_site_label_1 
 _geom_angle_atom_site_label_2 
 _geom_angle_atom_site_label_3 
 _geom_angle 
 _geom_angle_site_symmetry_1 
 _geom_angle_site_symmetry_3 
 _geom_angle_publ_flag 
O1 Co O4 90.57(8) . . ? 
O1 Co O2 89.45(8) . . ? 
O4 Co O2 179.53(8) . . ? 
O1 Co O3 178.70(8) . . ? 
O4 Co O3 90.15(8) . . ? 
O2 Co O3 89.83(8) . . ? 
O1 Co O10 90.06(8) . . ? 
O4 Co O10 92.76(8) . . ? 
O2 Co O10 86.76(8) . . ? 
O3 Co O10 88.81(8) . . ? 
O1 Co O5 92.17(8) . . ? 
O4 Co O5 89.05(8) . . ? 
O2 Co O5 91.42(7) . . ? 
O3 Co O5 88.93(8) . . ? 
O10 Co O5 177.11(8) . . ? 
C5 O5 Co 136.3(2) . . ? 
O5 C5 C8 137.4(3) . . ? 
O5 C5 C6 135.7(3) . . ? 
C8 C5 C6 86.8(2) . . ? 
O6 C6 C7 135.7(3) . . ? 
O6 C6 C5 134.7(3) . . ? 
C7 C6 C5 89.6(2) . . ? 
C6 C7 C8 93.5(2) . . ? 
C6 C7 C9 132.2(3) . . ? 
C8 C7 C9 134.3(3) . . ? 
O8 C8 C7 136.0(3) . . ? 
O8 C8 C5 134.0(2) . . ? 
C7 C8 C5 90.0(2) . . ? 
C10 O10 Co 131.5(2) . . ? 
O10 C10 C11 135.2(3) . . ? 
O10 C10 C13 137.4(3) . . ? 
C11 C10 C13 87.3(2) . . ? 
O11 C11 C12 136.4(3) . . ? 
O11 C11 C10 134.0(3) . . ? 
C12 C11 C10 89.6(2) . . ? 
C13 C12 C11 93.6(2) . . ? 
C13 C12 C14 133.5(3) . . ? 
C11 C12 C14 132.8(3) . . ? 
O13 C13 C12 136.9(3) . . ? 
O13 C13 C10 133.7(2) . . ? 
C12 C13 C10 89.4(2) . . ? 
  
_refine_diff_density_max    0.361 
_refine_diff_density_min   -0.284 
_refine_diff_density_rms    0.066 
  

data_LH9601 
  
_audit_creation_method            SHELXL 
_chemical_name_systematic 
; 
 ? 
; 
_chemical_name_common             ? 
_chemical_formula_moiety          ? 
_chemical_formula_structural      ? 
_chemical_formula_analytical      ? 
_chemical_formula_sum             'C10 H14 O10 Cu' 
_chemical_formula_weight          357.75 
_chemical_melting_point           ? 
_chemical_compound_source         ? 
  
loop_ 
 _atom_type_symbol 
 _atom_type_description 
 _atom_type_scat_dispersion_real 
 _atom_type_scat_dispersion_imag 
 _atom_type_scat_source 
 'C'  'C'   0.0033   0.0016 
 'International Tables Vol C Tables 4.2.6.8 and 6.1.1.4' 
 'H'  'H'   0.0000   0.0000 
 'International Tables Vol C Tables 4.2.6.8 and 6.1.1.4' 
 'O'  'O'   0.0106   0.0060 
 'International Tables Vol C Tables 4.2.6.8 and 6.1.1.4' 
 'Cu'  'Cu'   0.3201   1.2651 
 'International Tables Vol C Tables 4.2.6.8 and 6.1.1.4' 
  
_symmetry_cell_setting            Monoclinic 
_symmetry_space_group_name_H-M    P2(1)/n 
  
loop_ 
 _symmetry_equiv_pos_as_xyz 
 'x, y, z' 
 '-x+1/2, y+1/2, -z+1/2' 
 '-x, -y, -z' 
 'x-1/2, -y-1/2, z-1/2' 
  
_cell_length_a                    8.647(2) 
_cell_length_b                    16.139(4) 
_cell_length_c                    9.656(3) 
_cell_angle_alpha                 90.00 
_cell_angle_beta                  94.13(3) 
_cell_angle_gamma                 90.00 
_cell_volume                      1344.0(5) 
_cell_formula_units_Z             4 
_cell_measurement_temperature     293(2) 
_cell_measurement_reflns_used     25 
_cell_measurement_theta_min       5.05 
_cell_measurement_theta_max       12.51 
  
_exptl_crystal_description        Blocks 
_exptl_crystal_colour             Turquoise 
_exptl_crystal_size_max           0.60 
_exptl_crystal_size_mid           0.60 
_exptl_crystal_size_min           0.60 
_exptl_crystal_density_meas       ? 
_exptl_crystal_density_diffrn     1.768 
_exptl_crystal_density_method     ? 
_exptl_crystal_F_000              732 
_exptl_absorpt_coefficient_mu     1.675 
_exptl_absorpt_correction_type    Semi-empirical 
_exptl_absorpt_correction_T_min   0.2258 
_exptl_absorpt_correction_T_max   0.2811 
  
_exptl_special_details 
; 
 ? 
; 
  
_diffrn_ambient_temperature       293(2) 
_diffrn_radiation_wavelength      0.71073 
_diffrn_radiation_type            MoK\a 
_diffrn_radiation_source          'fine-focus sealed tube' 
_diffrn_radiation_monochromator   graphite 
_diffrn_measurement_device        'Siemens P4' 
_diffrn_measurement_method        '\w scans' 
_diffrn_standards_number          3 
_diffrn_standards_interval_count  97 
_diffrn_standards_interval_time   ? 
_diffrn_standards_decay_%         4.40 
_diffrn_reflns_number             2520 
_diffrn_reflns_av_R_equivalents   0.0335 
_diffrn_reflns_av_sigmaI/netI     0.0389 
_diffrn_reflns_limit_h_min        0 
_diffrn_reflns_limit_h_max        10 
_diffrn_reflns_limit_k_min        0 
_diffrn_reflns_limit_k_max        19 
_diffrn_reflns_limit_l_min        -11 
_diffrn_reflns_limit_l_max        11 
_diffrn_reflns_theta_min          2.46 
_diffrn_reflns_theta_max          24.99 
_reflns_number_total              2358 
_reflns_number_observed           2060 
_reflns_observed_criterion        >2sigma(I) 
  
_computing_data_collection        'Siemens XSCANS' 
_computing_cell_refinement        'Siemens XSCANS' 
_computing_data_reduction         'Siemens SHELXTL' 
_computing_structure_solution     'SHELXS-86 (Sheldrick, 1990)' 
_computing_structure_refinement   'SHELXL-93 (Sheldrick, 1993)' 
_computing_molecular_graphics     'Siemens SHELXTL' 
_computing_publication_material   'Siemens SHELXTL' 
  
_refine_special_details 
; 
 Refinement on F^2^ for ALL reflections except for 0 with very negative F^2^ 
 or flagged by the user for potential systematic errors.  Weighted R-factors 
 wR and all goodnesses of fit S are based on F^2^, conventional R-factors R 
 are based on F, with F set to zero for negative F^2^. The observed criterion 
 of F^2^ > 2sigma(F^2^) is used only for calculating _R_factor_obs etc. and is 
 not relevant to the choice of reflections for refinement.  R-factors based 
 on F^2^ are statistically about twice as large as those based on F, and R- 
 factors based on ALL data will be even larger. 
; 
  
_refine_ls_structure_factor_coef  Fsqd 
_refine_ls_matrix_type            full 
_refine_ls_weighting_scheme 
 'calc w=1/[\s^2^(Fo^2^)+(0.0487P)^2^+0.9636P] where P=(Fo^2^+2Fc^2^)/3' 
_atom_sites_solution_primary      direct 
_atom_sites_solution_secondary    difmap 
_atom_sites_solution_hydrogens    geom 
_refine_ls_hydrogen_treatment     ? 
_refine_ls_extinction_method      none 
_refine_ls_extinction_coef        ? 
_refine_ls_number_reflns          2358 
_refine_ls_number_parameters      222 
_refine_ls_number_restraints      8 
_refine_ls_R_factor_all           0.0421 
_refine_ls_R_factor_obs           0.0354 
_refine_ls_wR_factor_all          0.0980 
_refine_ls_wR_factor_obs          0.0928 
_refine_ls_goodness_of_fit_all    1.059 
_refine_ls_goodness_of_fit_obs    1.080 
_refine_ls_restrained_S_all       1.057 
_refine_ls_restrained_S_obs       1.078 
_refine_ls_shift/esd_max          -0.001 
_refine_ls_shift/esd_mean         0.000 
  
loop_ 
 _atom_site_label 
 _atom_site_type_symbol 
 _atom_site_fract_x 
 _atom_site_fract_y 
 _atom_site_fract_z 
 _atom_site_U_iso_or_equiv 
 _atom_site_thermal_displace_type 
 _atom_site_occupancy 
 _atom_site_calc_flag 
 _atom_site_refinement_flags 
 _atom_site_disorder_group 
Cu Cu 0.04318(4) 0.12620(2) 0.21154(3) 0.02120(15) Uani 1 d . . 
O1 O 0.2229(2) 0.09538(13) 0.1095(2) 0.0266(5) Uani 1 d D . 
H1A H 0.2275(43) 0.1218(18) 0.0279(17) 0.033(10) Uiso 1 d D . 
H1B H 0.2464(45) 0.0417(7) 0.0971(41) 0.048(11) Uiso 1 d D . 
O2 O 0.1546(3) 0.08511(14) 0.3852(2) 0.0295(5) Uani 1 d D . 
H2A H 0.2292(32) 0.1138(21) 0.4343(36) 0.046(11) Uiso 1 d D . 
H2B H 0.1611(50) 0.0300(4) 0.3989(44) 0.058(13) Uiso 1 d D . 
O3 O -0.1357(3) 0.15759(14) 0.3188(2) 0.0294(5) Uani 1 d D . 
H3A H -0.1582(51) 0.2118(7) 0.3266(46) 0.063(14) Uiso 1 d D . 
H3B H -0.1323(49) 0.1343(21) 0.4037(17) 0.047(12) Uiso 1 d D . 
O4 O -0.0669(3) 0.16629(13) 0.0378(2) 0.0272(5) Uani 1 d D . 
H4A H -0.1424(29) 0.1354(18) -0.0053(35) 0.040(11) Uiso 1 d D . 
H4B H -0.0823(48) 0.2213(4) 0.0300(42) 0.051(12) Uiso 1 d D . 
O5 O -0.0760(3) -0.00400(13) 0.1708(2) 0.0307(5) Uani 1 d . . 
C5 C -0.0643(3) -0.0709(2) 0.2276(3) 0.0237(6) Uani 1 d . . 
C6 C -0.1402(3) -0.1546(2) 0.2123(3) 0.0235(6) Uani 1 d . . 
O6 O -0.2463(2) -0.18404(13) 0.1335(2) 0.0299(5) Uani 1 d . . 
C7 C -0.0430(3) -0.1850(2) 0.3259(3) 0.0247(6) Uani 1 d . . 
C8 C 0.0330(3) -0.1077(2) 0.3485(3) 0.0235(6) Uani 1 d . . 
O8 O 0.1367(2) -0.07925(13) 0.4323(2) 0.0303(5) Uani 1 d . . 
C9 C -0.0293(5) -0.2669(2) 0.3919(4) 0.0407(8) Uani 1 d . . 
H9A H -0.1050(5) -0.3037(2) 0.3478(4) 0.061 Uiso 1 d R . 
H9B H -0.0457(5) -0.2623(2) 0.4889(4) 0.061 Uiso 1 d R . 
H9C H 0.0729(5) -0.2886(2) 0.3834(4) 0.061 Uiso 1 d R . 
O10 O 0.1595(3) 0.25314(13) 0.2575(2) 0.0325(5) Uani 1 d . . 
C10 C 0.1048(3) 0.3215(2) 0.2366(3) 0.0241(6) Uani 1 d . . 
C11 C 0.1290(3) 0.4054(2) 0.3006(3) 0.0236(6) Uani 1 d . . 
O11 O 0.2192(3) 0.43219(13) 0.3960(2) 0.0342(5) Uani 1 d . . 
C12 C 0.0079(3) 0.4382(2) 0.2071(3) 0.0253(6) Uani 1 d . . 
C13 C -0.0205(3) 0.3606(2) 0.1400(3) 0.0250(6) Uani 1 d . . 
O13 O -0.1106(3) 0.33345(13) 0.0438(2) 0.0350(6) Uani 1 d . . 
C14 C -0.0629(4) 0.5213(2) 0.1907(4) 0.0393(8) Uani 1 d . . 
H14A H 0.0161(4) 0.5621(2) 0.1800(4) 0.059 Uiso 1 d R . 
H14B H -0.1180(4) 0.5341(2) 0.2709(4) 0.059 Uiso 1 d R . 
H14C H -0.1356(4) 0.5218(2) 0.1108(4) 0.059 Uiso 1 d R . 
  
loop_ 
 _atom_site_aniso_label 
 _atom_site_aniso_U_11 
 _atom_site_aniso_U_22 
 _atom_site_aniso_U_33 
 _atom_site_aniso_U_23 
 _atom_site_aniso_U_13 
 _atom_site_aniso_U_12 
Cu 0.0220(2) 0.0193(2) 0.0217(2) 0.00055(13) -0.00211(15) 0.00128(13) 
O1 0.0310(11) 0.0221(11) 0.0267(11) 0.0038(9) 0.0024(9) 0.0035(9) 
O2 0.0315(12) 0.0259(12) 0.0293(12) 0.0017(9) -0.0100(9) -0.0044(9) 
O3 0.0334(12) 0.0267(12) 0.0280(12) 0.0015(9) 0.0024(10) 0.0047(9) 
O4 0.0308(11) 0.0233(11) 0.0262(11) 0.0009(9) -0.0063(9) 0.0002(9) 
O5 0.0360(12) 0.0212(11) 0.0338(12) 0.0053(9) -0.0048(10) -0.0042(9) 
C5 0.0230(14) 0.026(2) 0.0223(15) -0.0027(12) 0.0045(12) -0.0007(12) 
C6 0.0228(14) 0.0246(15) 0.0233(15) 0.0004(12) 0.0032(12) -0.0005(12) 
O6 0.0320(12) 0.0280(11) 0.0286(11) 0.0018(9) -0.0046(10) -0.0085(9) 
C7 0.0234(15) 0.0242(15) 0.0266(15) 0.0013(12) 0.0021(12) -0.0006(12) 
C8 0.0230(15) 0.0251(15) 0.0227(14) 0.0013(12) 0.0034(12) -0.0003(12) 
O8 0.0301(11) 0.0308(12) 0.0289(11) 0.0031(9) -0.0059(9) -0.0090(9) 
C9 0.047(2) 0.025(2) 0.047(2) 0.008(2) -0.011(2) -0.0040(15) 
O10 0.0330(12) 0.0197(11) 0.0429(13) 0.0004(9) -0.0100(10) 0.0010(9) 
C10 0.0230(15) 0.023(2) 0.026(2) 0.0012(12) 0.0014(12) -0.0034(12) 
C11 0.0236(14) 0.0197(14) 0.027(2) 0.0015(12) 0.0005(12) -0.0030(11) 
O11 0.0373(12) 0.0217(11) 0.0412(13) -0.0030(9) -0.0133(11) -0.0027(9) 
C12 0.0205(14) 0.024(2) 0.032(2) 0.0032(12) 0.0004(12) -0.0004(12) 
C13 0.0224(15) 0.0234(15) 0.029(2) 0.0032(12) 0.0000(12) -0.0012(12) 
O13 0.0361(13) 0.0270(12) 0.0390(13) -0.0030(10) -0.0170(11) 0.0020(10) 
C14 0.033(2) 0.026(2) 0.058(2) -0.002(2) -0.005(2) 0.0060(14) 
  
_geom_special_details 
; 
 All esds (except the esd in the dihedral angle between two l.s. planes) 
 are estimated using the full covariance matrix.  The cell esds are taken 
 into account individually in the estimation of esds in distances, angles 
 and torsion angles; correlations between esds in cell parameters are only 
 used when they are defined by crystal symmetry.  An approximate (isotropic) 
 treatment of cell esds is used for estimating esds involving l.s. planes. 
; 
  
loop_ 
 _geom_bond_atom_site_label_1 
 _geom_bond_atom_site_label_2 
 _geom_bond_distance 
 _geom_bond_site_symmetry_2 
 _geom_bond_publ_flag 
Cu O1 1.963(2) . ? 
Cu O4 1.977(2) . ? 
Cu O2 1.987(2) . ? 
Cu O3 1.988(2) . ? 
Cu O10 2.311(2) . ? 
Cu O5 2.361(2) . ? 
O5 C5 1.212(4) . ? 
C5 C6 1.505(4) . ? 
C5 C8 1.510(4) . ? 
C6 O6 1.243(4) . ? 
C6 C7 1.420(4) . ? 
C7 C8 1.420(4) . ? 
C7 C9 1.469(4) . ? 
C8 O8 1.251(4) . ? 
O10 C10 1.211(4) . ? 
C10 C11 1.496(4) . ? 
C10 C13 1.516(4) . ? 
C11 O11 1.241(4) . ? 
C11 C12 1.434(4) . ? 
C12 C13 1.423(4) . ? 
C12 C14 1.478(4) . ? 
C13 O13 1.248(4) . ? 
  
loop_ 
 _geom_angle_atom_site_label_1 
 _geom_angle_atom_site_label_2 
 _geom_angle_atom_site_label_3 
 _geom_angle 
 _geom_angle_site_symmetry_1 
 _geom_angle_site_symmetry_3 
 _geom_angle_publ_flag 
O1 Cu O4 90.41(9) . . ? 
O1 Cu O2 89.18(9) . . ? 
O4 Cu O2 179.50(9) . . ? 
O1 Cu O3 178.70(9) . . ? 
O4 Cu O3 90.78(9) . . ? 
O2 Cu O3 89.62(10) . . ? 
O1 Cu O10 88.39(9) . . ? 
O4 Cu O10 92.81(8) . . ? 
O2 Cu O10 87.48(8) . . ? 
O3 Cu O10 91.04(9) . . ? 
O1 Cu O5 92.43(9) . . ? 
O4 Cu O5 88.40(8) . . ? 
O2 Cu O5 91.31(8) . . ? 
O3 Cu O5 88.12(9) . . ? 
O10 Cu O5 178.54(8) . . ? 
C5 O5 Cu 134.1(2) . . ? 
O5 C5 C6 137.2(3) . . ? 
O5 C5 C8 136.4(3) . . ? 
C6 C5 C8 86.4(2) . . ? 
O6 C6 C7 135.3(3) . . ? 
O6 C6 C5 134.5(3) . . ? 
C7 C6 C5 90.3(2) . . ? 
C8 C7 C6 93.3(2) . . ? 
C8 C7 C9 134.6(3) . . ? 
C6 C7 C9 132.1(3) . . ? 
O8 C8 C7 136.4(3) . . ? 
O8 C8 C5 133.5(3) . . ? 
C7 C8 C5 90.0(2) . . ? 
C10 O10 Cu 128.1(2) . . ? 
O10 C10 C11 135.6(3) . . ? 
O10 C10 C13 137.3(3) . . ? 
C11 C10 C13 87.1(2) . . ? 
O11 C11 C12 136.9(3) . . ? 
O11 C11 C10 133.1(3) . . ? 
C12 C11 C10 90.0(2) . . ? 
C13 C12 C11 93.2(2) . . ? 
C13 C12 C14 133.9(3) . . ? 
C11 C12 C14 132.9(3) . . ? 
O13 C13 C12 136.6(3) . . ? 
O13 C13 C10 133.8(3) . . ? 
C12 C13 C10 89.6(2) . . ? 
  
_refine_diff_density_max    0.491 
_refine_diff_density_min   -0.485 
_refine_diff_density_rms    0.083 
  

data_LH9709 
  
_audit_creation_method            SHELXL 
_chemical_name_systematic 
; 
 ? 
; 
_chemical_name_common             ? 
_chemical_formula_moiety          ? 
_chemical_formula_structural      ? 
_chemical_formula_analytical      ? 
_chemical_formula_sum             'C10 H14 O10 Zn' 
_chemical_formula_weight          359.58 
_chemical_melting_point           ? 
_chemical_compound_source         ? 
  
loop_ 
 _atom_type_symbol 
 _atom_type_description 
 _atom_type_scat_dispersion_real 
 _atom_type_scat_dispersion_imag 
 _atom_type_scat_source 
 'C'  'C'   0.0181   0.0091 
 'International Tables Vol C Tables 4.2.6.8 and 6.1.1.4' 
 'H'  'H'   0.0000   0.0000 
 'International Tables Vol C Tables 4.2.6.8 and 6.1.1.4' 
 'O'  'O'   0.0492   0.0322 
 'International Tables Vol C Tables 4.2.6.8 and 6.1.1.4' 
 'Zn'  'Zn'  -1.5491   0.6778 
 'International Tables Vol C Tables 4.2.6.8 and 6.1.1.4' 
  
_symmetry_cell_setting            Monoclinic 
_symmetry_space_group_name_H-M    P2(1)/n 
  
loop_ 
 _symmetry_equiv_pos_as_xyz 
 'x, y, z' 
 '-x+1/2, y+1/2, -z+1/2' 
 '-x, -y, -z' 
 'x-1/2, -y-1/2, z-1/2' 
  
_cell_length_a                    8.7929(9) 
_cell_length_b                    15.9814(9) 
_cell_length_c                    9.7924(4) 
_cell_angle_alpha                 90.00 
_cell_angle_beta                  93.606(9) 
_cell_angle_gamma                 90.00 
_cell_volume                      1373.3(2) 
_cell_formula_units_Z             4 
_cell_measurement_temperature     293(2) 
_cell_measurement_reflns_used     25 
_cell_measurement_theta_min       10.91 
_cell_measurement_theta_max       24.97 
  
_exptl_crystal_description        Blocks 
_exptl_crystal_colour             Clear 
_exptl_crystal_size_max           0.40 
_exptl_crystal_size_mid           0.38 
_exptl_crystal_size_min           0.35 
_exptl_crystal_density_meas       ? 
_exptl_crystal_density_diffrn     1.739 
_exptl_crystal_density_method     ? 
_exptl_crystal_F_000              736 
_exptl_absorpt_coefficient_mu     2.982 
_exptl_absorpt_correction_type    Semi-empirical 
_exptl_absorpt_correction_T_min   0.2153 
_exptl_absorpt_correction_T_max   0.3136 
  
_exptl_special_details 
; 
 ? 
; 
  
_diffrn_ambient_temperature       293(2) 
_diffrn_radiation_wavelength      1.54178 
_diffrn_radiation_type            CuK\a 
_diffrn_radiation_source          'fine-focus sealed tube' 
_diffrn_radiation_monochromator   graphite 
_diffrn_measurement_device        'Siemens P4' 
_diffrn_measurement_method        '\w scans' 
_diffrn_standards_number          3 
_diffrn_standards_interval_count  97 
_diffrn_standards_interval_time   ? 
_diffrn_standards_decay_%         2.05 
_diffrn_reflns_number             2438 
_diffrn_reflns_av_R_equivalents   0.0308 
_diffrn_reflns_av_sigmaI/netI     0.0286 
_diffrn_reflns_limit_h_min        -9 
_diffrn_reflns_limit_h_max        10 
_diffrn_reflns_limit_k_min        -13 
_diffrn_reflns_limit_k_max        18 
_diffrn_reflns_limit_l_min        -8 
_diffrn_reflns_limit_l_max        11 
_diffrn_reflns_theta_min          5.31 
_diffrn_reflns_theta_max          64.00 
_reflns_number_total              2282 
_reflns_number_observed           2017 
_reflns_observed_criterion        >2sigma(I) 
  
_computing_data_collection        'Siemens XSCANS' 
_computing_cell_refinement        'Siemens XSCANS' 
_computing_data_reduction         'Siemens SHELXTL' 
_computing_structure_solution     'SHELXS-86 (Sheldrick, 1990)' 
_computing_structure_refinement   'SHELXL-93 (Sheldrick, 1993)' 
_computing_molecular_graphics     'Siemens SHELXTL' 
_computing_publication_material   'Siemens SHELXTL' 
  
_refine_special_details 
; 
 Refinement on F^2^ for ALL reflections except for 0 with very negative F^2^ 
 or flagged by the user for potential systematic errors.  Weighted R-factors 
 wR and all goodnesses of fit S are based on F^2^, conventional R-factors R 
 are based on F, with F set to zero for negative F^2^. The observed criterion 
 of F^2^ > 2sigma(F^2^) is used only for calculating _R_factor_obs etc. and is 
 not relevant to the choice of reflections for refinement.  R-factors based 
 on F^2^ are statistically about twice as large as those based on F, and R- 
 factors based on ALL data will be even larger. 
; 
  
_refine_ls_structure_factor_coef  Fsqd 
_refine_ls_matrix_type            full 
_refine_ls_weighting_scheme 
 'calc w=1/[\s^2^(Fo^2^)+(0.0458P)^2^+0.9239P] where P=(Fo^2^+2Fc^2^)/3' 
_atom_sites_solution_primary      direct 
_atom_sites_solution_secondary    difmap 
_atom_sites_solution_hydrogens    geom 
_refine_ls_hydrogen_treatment     ? 
_refine_ls_extinction_method      SHELXL 
_refine_ls_extinction_coef        0.0078(4) 
_refine_ls_extinction_expression 
 'Fc^*^=kFc[1+0.001xFc^2^\l^3^/sin(2\q)]^-1/4^' 
_refine_ls_number_reflns          2282 
_refine_ls_number_parameters      223 
_refine_ls_number_restraints      8 
_refine_ls_R_factor_all           0.0410 
_refine_ls_R_factor_obs           0.0355 
_refine_ls_wR_factor_all          0.0951 
_refine_ls_wR_factor_obs          0.0914 
_refine_ls_goodness_of_fit_all    1.149 
_refine_ls_goodness_of_fit_obs    1.182 
_refine_ls_restrained_S_all       1.146 
_refine_ls_restrained_S_obs       1.180 
_refine_ls_shift/esd_max          -0.002 
_refine_ls_shift/esd_mean         0.000 
  
loop_ 
 _atom_site_label 
 _atom_site_type_symbol 
 _atom_site_fract_x 
 _atom_site_fract_y 
 _atom_site_fract_z 
 _atom_site_U_iso_or_equiv 
 _atom_site_thermal_displace_type 
 _atom_site_occupancy 
 _atom_site_calc_flag 
 _atom_site_refinement_flags 
 _atom_site_disorder_group 
Zn Zn 0.03994(4) 0.12466(3) 0.21060(4) 0.0293(2) Uani 1 d . . 
O1 O 0.2260(3) 0.09247(14) 0.1054(2) 0.0354(5) Uani 1 d D . 
H1A H 0.2257(52) 0.1168(24) 0.0226(19) 0.064(14) Uiso 1 d D . 
H1B H 0.2537(44) 0.0387(8) 0.0952(42) 0.053(12) Uiso 1 d D . 
O2 O 0.1536(3) 0.08547(14) 0.3900(2) 0.0371(5) Uani 1 d D . 
H2A H 0.2335(38) 0.1146(29) 0.4270(54) 0.104(21) Uiso 1 d D . 
H2B H 0.1646(50) 0.0307(7) 0.4096(45) 0.065(13) Uiso 1 d D . 
O3 O -0.1458(3) 0.16017(14) 0.3221(2) 0.0366(5) Uani 1 d D . 
H3A H -0.1791(53) 0.2134(10) 0.3239(51) 0.081(16) Uiso 1 d D . 
H3B H -0.1417(50) 0.1311(22) 0.4010(22) 0.058(13) Uiso 1 d D . 
O4 O -0.0730(3) 0.16506(14) 0.0333(2) 0.0357(5) Uani 1 d D . 
H4A H -0.1514(30) 0.1349(22) -0.0042(41) 0.060(13) Uiso 1 d D . 
H4B H -0.0916(46) 0.2200(6) 0.0210(41) 0.053(12) Uiso 1 d D . 
O5 O -0.0671(2) 0.00263(13) 0.1796(2) 0.0341(5) Uani 1 d . . 
C5 C -0.0549(3) -0.0656(2) 0.2338(3) 0.0278(6) Uani 1 d . . 
C6 C -0.1337(3) -0.1494(2) 0.2161(3) 0.0283(6) Uani 1 d . . 
O6 O -0.2407(2) -0.17639(14) 0.1391(2) 0.0361(5) Uani 1 d . . 
C7 C -0.0378(3) -0.1828(2) 0.3253(3) 0.0315(6) Uani 1 d . . 
C8 C 0.0411(3) -0.1059(2) 0.3490(3) 0.0282(6) Uani 1 d . . 
O8 O 0.1452(2) -0.08013(14) 0.4302(2) 0.0371(5) Uani 1 d . . 
C9 C -0.0260(5) -0.2663(2) 0.3885(4) 0.0481(9) Uani 1 d . . 
H9A H -0.1161(5) -0.2979(2) 0.3629(4) 0.072 Uiso 1 d R . 
H9B H -0.0156(5) -0.2607(2) 0.4862(4) 0.072 Uiso 1 d R . 
H9C H 0.0616(5) -0.2947(2) 0.3573(4) 0.072 Uiso 1 d R . 
O10 O 0.1417(3) 0.24625(13) 0.2538(2) 0.0366(5) Uani 1 d . . 
C10 C 0.0923(3) 0.3167(2) 0.2321(3) 0.0303(6) Uani 1 d . . 
C11 C 0.1215(3) 0.4008(2) 0.2949(3) 0.0310(7) Uani 1 d . . 
O11 O 0.2110(3) 0.42702(14) 0.3889(2) 0.0425(6) Uani 1 d . . 
C12 C 0.0052(3) 0.4359(2) 0.2046(3) 0.0328(7) Uani 1 d . . 
C13 C -0.0263(3) 0.3582(2) 0.1374(3) 0.0326(7) Uani 1 d . . 
O13 O -0.1145(3) 0.33287(15) 0.0425(3) 0.0453(6) Uani 1 d . . 
C14 C -0.0603(4) 0.5208(2) 0.1897(4) 0.0498(9) Uani 1 d . . 
H14A H 0.0204(4) 0.5613(2) 0.1932(4) 0.075 Uiso 1 d R . 
H14B H -0.1256(4) 0.5311(2) 0.2629(4) 0.075 Uiso 1 d R . 
H14C H -0.1183(4) 0.5251(2) 0.1036(4) 0.075 Uiso 1 d R . 
  
loop_ 
 _atom_site_aniso_label 
 _atom_site_aniso_U_11 
 _atom_site_aniso_U_22 
 _atom_site_aniso_U_33 
 _atom_site_aniso_U_23 
 _atom_site_aniso_U_13 
 _atom_site_aniso_U_12 
Zn 0.0323(3) 0.0258(2) 0.0290(3) 0.00036(15) -0.0043(2) 0.00032(15) 
O1 0.0422(12) 0.0289(11) 0.0350(12) 0.0032(9) 0.0019(10) 0.0048(9) 
O2 0.0426(13) 0.0316(12) 0.0353(12) 0.0016(10) -0.0126(10) -0.0037(10) 
O3 0.0401(12) 0.0355(12) 0.0342(12) 0.0032(10) 0.0015(10) 0.0058(10) 
O4 0.0390(12) 0.0327(12) 0.0340(11) -0.0006(9) -0.0089(9) 0.0004(10) 
O5 0.0384(12) 0.0273(11) 0.0354(11) 0.0038(9) -0.0065(9) -0.0030(9) 
C5 0.0280(14) 0.029(2) 0.0261(14) 0.0001(12) 0.0005(11) -0.0015(11) 
C6 0.0322(15) 0.0282(15) 0.0247(14) -0.0004(12) 0.0022(12) -0.0024(12) 
O6 0.0387(12) 0.0348(12) 0.0339(11) 0.0033(9) -0.0058(10) -0.0090(9) 
C7 0.032(2) 0.029(2) 0.033(2) 0.0012(13) 0.0033(12) -0.0009(12) 
C8 0.0273(14) 0.0292(15) 0.0284(15) 0.0024(12) 0.0039(12) 0.0008(11) 
O8 0.0375(12) 0.0360(12) 0.0363(12) 0.0068(9) -0.0096(10) -0.0077(9) 
C9 0.057(2) 0.032(2) 0.053(2) 0.007(2) -0.016(2) -0.005(2) 
O10 0.0391(12) 0.0240(11) 0.0451(13) 0.0003(9) -0.0111(10) 0.0007(9) 
C10 0.0293(15) 0.028(2) 0.033(2) 0.0017(12) -0.0010(12) -0.0041(12) 
C11 0.0293(15) 0.029(2) 0.035(2) 0.0003(12) -0.0002(13) -0.0019(12) 
O11 0.0495(14) 0.0298(12) 0.0455(14) -0.0026(10) -0.0178(11) -0.0043(10) 
C12 0.0281(15) 0.029(2) 0.041(2) 0.0012(13) 0.0000(13) 0.0004(12) 
C13 0.0297(15) 0.0270(15) 0.040(2) 0.0030(13) -0.0038(13) 0.0003(12) 
O13 0.0489(14) 0.0340(12) 0.0498(14) -0.0020(10) -0.0237(12) 0.0032(10) 
C14 0.046(2) 0.031(2) 0.069(3) -0.001(2) -0.013(2) 0.0070(15) 
  
_geom_special_details 
; 
 All esds (except the esd in the dihedral angle between two l.s. planes) 
 are estimated using the full covariance matrix.  The cell esds are taken 
 into account individually in the estimation of esds in distances, angles 
 and torsion angles; correlations between esds in cell parameters are only 
 used when they are defined by crystal symmetry.  An approximate (isotropic) 
 treatment of cell esds is used for estimating esds involving l.s. planes. 
; 
  
loop_ 
 _geom_bond_atom_site_label_1 
 _geom_bond_atom_site_label_2 
 _geom_bond_distance 
 _geom_bond_site_symmetry_2 
 _geom_bond_publ_flag 
Zn O4 2.050(2) . ? 
Zn O1 2.053(2) . ? 
Zn O2 2.063(2) . ? 
Zn O3 2.099(2) . ? 
Zn O10 2.170(2) . ? 
Zn O5 2.178(2) . ? 
O5 C5 1.214(4) . ? 
C5 C8 1.511(4) . ? 
C5 C6 1.512(4) . ? 
C6 O6 1.246(4) . ? 
C6 C7 1.424(4) . ? 
C7 C8 1.423(4) . ? 
C7 C9 1.471(4) . ? 
C8 O8 1.244(4) . ? 
O10 C10 1.220(4) . ? 
C10 C11 1.493(4) . ? 
C10 C13 1.506(4) . ? 
C11 O11 1.246(4) . ? 
C11 C12 1.424(4) . ? 
C12 C13 1.424(4) . ? 
C12 C14 1.478(4) . ? 
C13 O13 1.240(4) . ? 
  
loop_ 
 _geom_angle_atom_site_label_1 
 _geom_angle_atom_site_label_2 
 _geom_angle_atom_site_label_3 
 _geom_angle 
 _geom_angle_site_symmetry_1 
 _geom_angle_site_symmetry_3 
 _geom_angle_publ_flag 
O4 Zn O1 90.74(9) . . ? 
O4 Zn O2 179.30(9) . . ? 
O1 Zn O2 89.58(9) . . ? 
O4 Zn O3 90.25(9) . . ? 
O1 Zn O3 178.14(9) . . ? 
O2 Zn O3 89.42(9) . . ? 
O4 Zn O10 93.16(9) . . ? 
O1 Zn O10 89.45(9) . . ? 
O2 Zn O10 86.22(9) . . ? 
O3 Zn O10 88.92(9) . . ? 
O4 Zn O5 88.96(8) . . ? 
O1 Zn O5 93.26(9) . . ? 
O2 Zn O5 91.64(8) . . ? 
O3 Zn O5 88.33(9) . . ? 
O10 Zn O5 176.54(9) . . ? 
C5 O5 Zn 135.9(2) . . ? 
O5 C5 C8 137.6(3) . . ? 
O5 C5 C6 135.9(3) . . ? 
C8 C5 C6 86.5(2) . . ? 
O6 C6 C7 135.6(3) . . ? 
O6 C6 C5 134.4(3) . . ? 
C7 C6 C5 90.1(2) . . ? 
C8 C7 C6 93.3(2) . . ? 
C8 C7 C9 133.9(3) . . ? 
C6 C7 C9 132.8(3) . . ? 
O8 C8 C7 136.2(3) . . ? 
O8 C8 C5 133.7(3) . . ? 
C7 C8 C5 90.1(2) . . ? 
C10 O10 Zn 130.9(2) . . ? 
O10 C10 C11 135.1(3) . . ? 
O10 C10 C13 137.6(3) . . ? 
C11 C10 C13 87.2(2) . . ? 
O11 C11 C12 136.2(3) . . ? 
O11 C11 C10 133.7(3) . . ? 
C12 C11 C10 90.0(2) . . ? 
C11 C12 C13 93.2(2) . . ? 
C11 C12 C14 133.1(3) . . ? 
C13 C12 C14 133.8(3) . . ? 
O13 C13 C12 136.4(3) . . ? 
O13 C13 C10 134.0(3) . . ? 
C12 C13 C10 89.5(2) . . ? 
  
_refine_diff_density_max    0.325 
_refine_diff_density_min   -0.396 
_refine_diff_density_rms    0.072 
  
